# Supplementary material
Source: PubMed Central journal article supplement (PMC5129885)
Supplement: cr201674x3.pdf [file cr201674x3.pdf]

## Supplementary table 1A Hill function fitting results for gene expression

repression by LEVI mutants.

| Parameter | LEVI           |                    | LEVI (M165I M135) |                    | LEVI (I74V)    |                    | Unit             |
|-----------|----------------|--------------------|-------------------|--------------------|----------------|--------------------|------------------|
|           | Best-fit value | Fit standard error | Best-fit value    | Fit standard error | Best-fit value | Fit standard error |                  |
| <b>a</b>  | 100.014        | 0.008              | 97                | 3                  | 100.000        | 0.006              |                  |
| <b>b</b>  | 0.0008         | 0.0006             | 0.015             | 0.011              | 0.010          | 0.007              |                  |
| <b>n</b>  | 1.07           | 0.05               | 1.7               | 0.2                | 2.89           | 0.07               |                  |
| <b>k</b>  | 0.0026         | 0.0004             | 0.0007            | 0.0003             | 0.050          | 0.001              | W/m <sup>2</sup> |

Data fitted to repressing Hill function  $[b + (a * k^n)/(I r^n + k^n)]$  using the method of least squares[1].

b represents the leak expression when cells were illuminated with light of infinite intensity.

a+b represents the maximal expression in darkness.

n represents Hill coefficient.

k represents the light intensity for half-maximal response.

**Supplementary table 1B** Comparison of gene expression methodologies in *Escherichia coli*.

|                                | LightOff system                                                                                                                                            | pET system[2]                                                                                                                       | pBAD system <sup>[3]</sup>                                                  | Cph1/OmpR <sup>[1,4-6]</sup>                                                                       | ccaS/ccaR <sup>[1,5,6]</sup>                                                                                                       | FixJ/YF1[7]                                                                                                                                                          |
|--------------------------------|------------------------------------------------------------------------------------------------------------------------------------------------------------|-------------------------------------------------------------------------------------------------------------------------------------|-----------------------------------------------------------------------------|----------------------------------------------------------------------------------------------------|------------------------------------------------------------------------------------------------------------------------------------|----------------------------------------------------------------------------------------------------------------------------------------------------------------------|
| Regulator                      | blue light                                                                                                                                                 | lactose or its analogs                                                                                                              | arabinose                                                                   | red light                                                                                          | green light                                                                                                                        | blue light                                                                                                                                                           |
| Inducer toxicity               | low                                                                                                                                                        | high                                                                                                                                | low                                                                         | low                                                                                                | low                                                                                                                                | low                                                                                                                                                                  |
| Components                     | LEVI                                                                                                                                                       | LacI                                                                                                                                | AraC                                                                        | ompR and Cph8                                                                                      | CcaR and CcaS                                                                                                                      | FixJ and YF1                                                                                                                                                         |
| Induction efficiency           | similar to T7 promoter                                                                                                                                     | T7 promoter                                                                                                                         | lower than T7 promoter                                                      | N.D                                                                                                | N.D                                                                                                                                | 20% of T7 promoter <sup>a</sup>                                                                                                                                      |
| leakage                        | extremely low                                                                                                                                              | high <sup>a</sup>                                                                                                                   | low                                                                         | N.D                                                                                                | N.D                                                                                                                                | high <sup>a</sup>                                                                                                                                                    |
| Induction ratio                | ~10,000-fold                                                                                                                                               | ~200-fold <sup>a</sup>                                                                                                              | ~1,700-fold <sup>a</sup>                                                    | 72-fold <sup>[6]</sup>                                                                             | 117-fold <sup>[6]</sup>                                                                                                            | 16-fold for pDusk <sup>a</sup>                                                                                                                                       |
| Host <i>E.coli</i> strain      | all strains                                                                                                                                                | with <i>DE3</i>                                                                                                                     | <i>araBADC</i> and <i>araEFGH</i> <sup>+</sup>                              | <i>envZ</i> deleted                                                                                | N.D                                                                                                                                | N.D                                                                                                                                                                  |
| Reversibility                  | Reversible                                                                                                                                                 | reversible but difficult                                                                                                            | reversible but difficult                                                    | reversible                                                                                         | reversible                                                                                                                         | N.D                                                                                                                                                                  |
| Spatial control                | Yes                                                                                                                                                        | no                                                                                                                                  | no                                                                          | yes                                                                                                | yes                                                                                                                                | yes                                                                                                                                                                  |
| Gradient induction             | Yes                                                                                                                                                        | no                                                                                                                                  | yes                                                                         | yes                                                                                                | yes                                                                                                                                | yes                                                                                                                                                                  |
| Light sensitivity <sup>c</sup> | 2.6 mW·m <sup>-2</sup> blue light for LEVI.<br>0.71 mW·m <sup>-2</sup> blue light for LEVI (M135I M165I). 50 mW·m <sup>-2</sup> blue light for LEVI (I74V) |                                                                                                                                     |                                                                             | 24 mW·m <sup>-2</sup> red light <sup>[11]</sup> .                                                  | 10 mW·m <sup>-2</sup> green light or<br>138 mW·m <sup>-2</sup> green light in the presence of inhibiting red light <sup>[11]</sup> | 22 mW·m <sup>-2</sup> blue light in <i>BL21(DE3)</i> strain <sup>a</sup>                                                                                             |
| Additional                     | LEVI allows adaptability in controlling transcriptional activities of various promoters.                                                                   | <i>BL21(DE3) pLysS</i> strain containing pLysS plasmid can be used to reduce leak expression, but with reduced induction efficiency | Leak expression levels may be further repressed in the presence of glucose. | ho1 and pcyA convert haem into phycocyanobili which is required for the function of light sensors. | ho1 and pcyA convert haem into phycocyanobili which is required for the function of light sensors.                                 | A cI/P <sub>R</sub> circuit enables higher induction efficiency and 460-fold induction ratio in a specific riboflavin-auxotrophic <i>E. coli</i> strain <sup>b</sup> |

N.D. Not determined or not available. <sup>a</sup>in this study. <sup>b</sup> from the published data. <sup>c</sup>Light sensitivity refers to the light intensity required for 50% response.
